# Supplementary material
Source: publisher figshare collection journal article supplement (https://tandf.figshare.com/ndownloader/files/26010971)
Supplement: Supplementary file 1 [file 26010971]

## Sheet: Conference Emissions
A Framework to Estimate Emissions from Virtual Conferences
By Grant Faber, gfaber@umich.edu
		Needed user input for variables is in light green
		Calculated results and carry-over cells are in light blue
		USER ASSUMPTIONS					RESULTS
		Direct Assumptions					Total Conference Emissions	1323.94	kg CO2-eq
		Pc - conference participants	207	computer			Desired Offset Multiplier	2	x
		Hc - conference duration	6	hour			Offset Cost	1.1	$/kg
		Y - average service life of computer/monitor	4	year			Total Offset Cost	2912.68	$
		Hd - average daily hours of computer use	2	hour/day
		D - data rate	5.5	Mbps/computer
		S - servers	1	server
		Ws - server power rating	0.594	kW/server
		O - organizer meetings	30	meeting
		Po - organizer meeting participants	10	computer
		Ho - organizer meeting duration	1	hour
		Q - queries	10000	query
		Eq - emissions per query	0.0002	kg CO2-eq/query
		M - monitors in use	40	monitor
		Em - average monitor life cycle emissions	626	kg CO2-eq/monitor
		L - lamps in use	40	lamp
		Wl - power rating of lamps	0.1	kW/lamp
		Website 1 visits	5400	visit
		Emissions per website 1 visit	0.00133	kg CO2-eq/visit
		Website 2 visits	1600	visit
		Emissions per website 2 visit	0.00239	kg CO2-eq/visit
		Calculated Assumptions
		Ec - average computer life cycle emissions	340.289	kg CO2-eq/computer
		Ee - US average electricity emissions	0.432164	kg CO2-eq/kWh
		I - Internet energy intensity	0.642884	kWh/GB
		FORMULA 1: CONFERENCE COMPUTER EMISSIONS
		Pc - conference participants	207	computer
		Ec - average computer life cycle emissions	340.289	kg CO2-eq/computer
		Hc - conference duration	6	hour
		Y - average service life of computer/monitor	4	year
		Hd - average daily hours of computer use	2	hour/day			SENSITIVITY ANALYSIS
		Conference Computer Emissions	144.64	kg CO2-eq			Ec - Life Cycle Computer Emissions	1323.94
							50	1170.75
		FORMULA 2: NETWORK DATA TRANSFER EMISSIONS					100	1197.14
		Pc - conference participants	207	computer			150	1223.52
		Ee - US average electricity emissions	0.432164	kg CO2-eq/kWh			200	1249.91
		I - Internet energy intensity	0.642884	kWh/GB			250	1276.3
		D - data rate	5.5	Mbps/computer			300	1302.68
		Hc - conference duration	6	hour			350	1329.07
		Network Data Transfer Emissions	854.041	kg CO2-eq			400	1355.46
							450	1381.84
		FORMULA 3: SERVER EMISSIONS					500	1408.23
		Ee - US average electricity emissions	0.432164	kg CO2-eq/kWh
		S - servers	1	server			Y - Average Computer Life	1323.94
		Ws - server power rating	0.594	kW/server			1	2016.93
		Hc - conference duration	6	hour			2	1554.94
		Server Emissions	1.54023	kg CO2-eq			3	1400.94
							4	1323.94
		FORMULA 4: ORGANIZER MEETING EMISSIONS					5	1277.75
		O - organizer meetings	30	meeting			6	1246.95
		Po - organizer meeting participants	10	computer			7	1224.95
		Ec - average computer life cycle emissions	340.289	kg CO2-eq/computer			8	1208.45
		Ho - organizer meeting duration	1	hour
		Y - average service life of computer/monitor	4	year			Hd - Hours Daily Computer Use	1323.94
		Hd - average daily hours of computer use	2	hour/day			1	1554.94
		Ee - US average electricity emissions	0.432164	kg CO2-eq/kWh			2	1323.94
		I - Internet energy intensity	0.642884	kWh/GB			3	1246.95
		D - data rate	5.5	Mbps/computer			4	1208.45
		S - servers	1	server			5	1185.35
		Ws - server power rating	0.594	kW/server			6	1169.95
		Organizer Meeting Emissions	248.928	kg CO2-eq			7	1158.95
							8	1150.7
		FORMULA 5: SEARCH ENGINE QUERY EMISSIONS
		Q - queries	10000	query			Ee - Average Electricity Emissions	1323.94
		Eq - emissions per query	0.0002	kg CO2-eq/query			0.1	493.892
		Search Engine Query Emissions	2	kg CO2-eq			0.2	743.784
							0.3	993.676
		FORMULA 6: MONITOR USAGE EMISSIONS					0.4	1243.57
		M - monitors in use	40	monitor			0.5	1493.46
		Em - average monitor life cycle emissions	626	kg CO2-eq/monitor			0.6	1743.35
		Hc - conference duration	6	hour			0.7	1993.24
		Y - average service life of computer/monitor	4	year			0.8	2243.14
		Hd - average daily hours of computer use	2	hour/day			0.9	2493.03
		Monitor Usage Emissions	51.4168	kg CO2-eq			1	2742.92
		FORMULA 7: DESK LAMP USAGE EMISSIONS					I - Internet Energy Intensity	1323.94
		L - lamps in use	40	lamp			0.1	428.547
		Wl - power rating of lamps	0.1	kW/lamp			0.2	593.48
		Ee - electricity emissions	0.432164	kg CO2-eq/kWh			0.3	758.414
		Hc - conference duration	6	hour			0.4	923.347
		Desk Lamp Usage Emissions	10.3719	kg CO2-eq			0.5	1088.28
							0.6	1253.21
		FORMULA 8: WEBSITE VISIT EMISSIONS					0.7	1418.15
		V1 - website 1 visits	5400	visit			0.8	1583.08
		Ev1 - emissions per website 1 visit	0.00133	kg CO2-eq/visit			0.9	1748.01
		V2 - website 2 visits	1600	visit			1	1912.95
		Ev2 - emissions per website 2 visit	0.00239	kg CO2-eq/visit
		Website Visit Emissions	11.006	kg CO2-eq			D - Data Rate	1323.94
							1.5	552.795
							2.5	745.582
							3.5	938.37
							4.5	1131.16
							5.5	1323.94
							6.5	1516.73
							7.5	1709.52
							8.5	1902.31

## Sheet: Participant Computers
A Framework to Estimate Emissions from Virtual Conferences
By Grant Faber, gfaber@umich.edu
		Computer	Emissions (kg CO2-eq)		Company	Source for Product Carbon Footprints
		Chromebook	235		Dell	https://www.dell.com/learn/us/en/uscorp1/corp-comm/environment_carbon_footprint_products
		Dell PC	800		Lenovo	https://www.lenovo.com/us/en/compliance/eco-declaration
		Dell Vostro	350		Apple ("Product Env. Report Card")	https://www.apple.com/environment/our-approach/
		Dell Vostro 5490	350		HP	https://h22235.www2.hp.com/hpinfo/globalcitizenship/environment/productdata/ProductCarbonFootprintnotebooks.html
		HP Pavilion laptop	265		Asus	https://csr.asus.com/english/article.aspx?id=1736
		HP Pavilion x360	265		Sony	https://www.sony.net/SonyInfo/csr_report/environment/data/
		HP Pavillion	265		Acer (generalized)	https://www.greenpeace.org/usa/wp-content/uploads/2017/10/GGE2017_Acer.pdf
		HP Pavillion laptop	265
		HP Spectre 2-1 running Windows 10	355
		Lenovo Ideapad S510p	294		AVG COMPUTER EMISSIONS FOR 45 PARTICIPANT SAMPLE
		Lenovo laptop	457
		Lenovo laptop	457		340.289
		Lenovo T440S	394
		Mac	394
		Mac	394
		Mac	394
		Mac	394
		Mac Air	174
		Mac Airbook	174
		MacBook	394
		MacBook	394
		Macbook	394
		MacBook	394
		macbook	394
		MacBook 13-inch, 2018	229
		Macbook Air	174
		MacBook Air	174
		Macbook air	174
		Macbook Air	174
		Macbook Air 13"	174
		MacBook Air 2017	339
		MacBook Pro	394
		MacBook Pro	394
		Macbook Pro	394
		MacBook Pro	394
		MacBook Pro	394
		MacBook Pro	394
		MacBook Pro	394
		Macbook Pro	394
		Macbook Pro 15 inch (2019)	334
		MacBook Pro 15"	334
		macbook pro 2019 15 inch	334
		MacbookPro 2017	449
		Macintosh	394
		Microsoft Surface Book	232
